# Supplementary material for: Extracellular chloride signals collagen IV network assembly during basement membrane formation
Source: PubMed Central journal article supplement — J Cell Biol. 2016 May 23;213(4):479–94. doi: 10.1083/jcb.201510065 (PMC4878091; doi:10.1083/jcb.201510065), 2016-05-23
Supplement: JCB_201510065_sm.pdf [file JCB_201510065_sm.pdf]

Cummings et al., <http://www.jcb.org/cgi/content/full/jcb.2015.10065/DC1>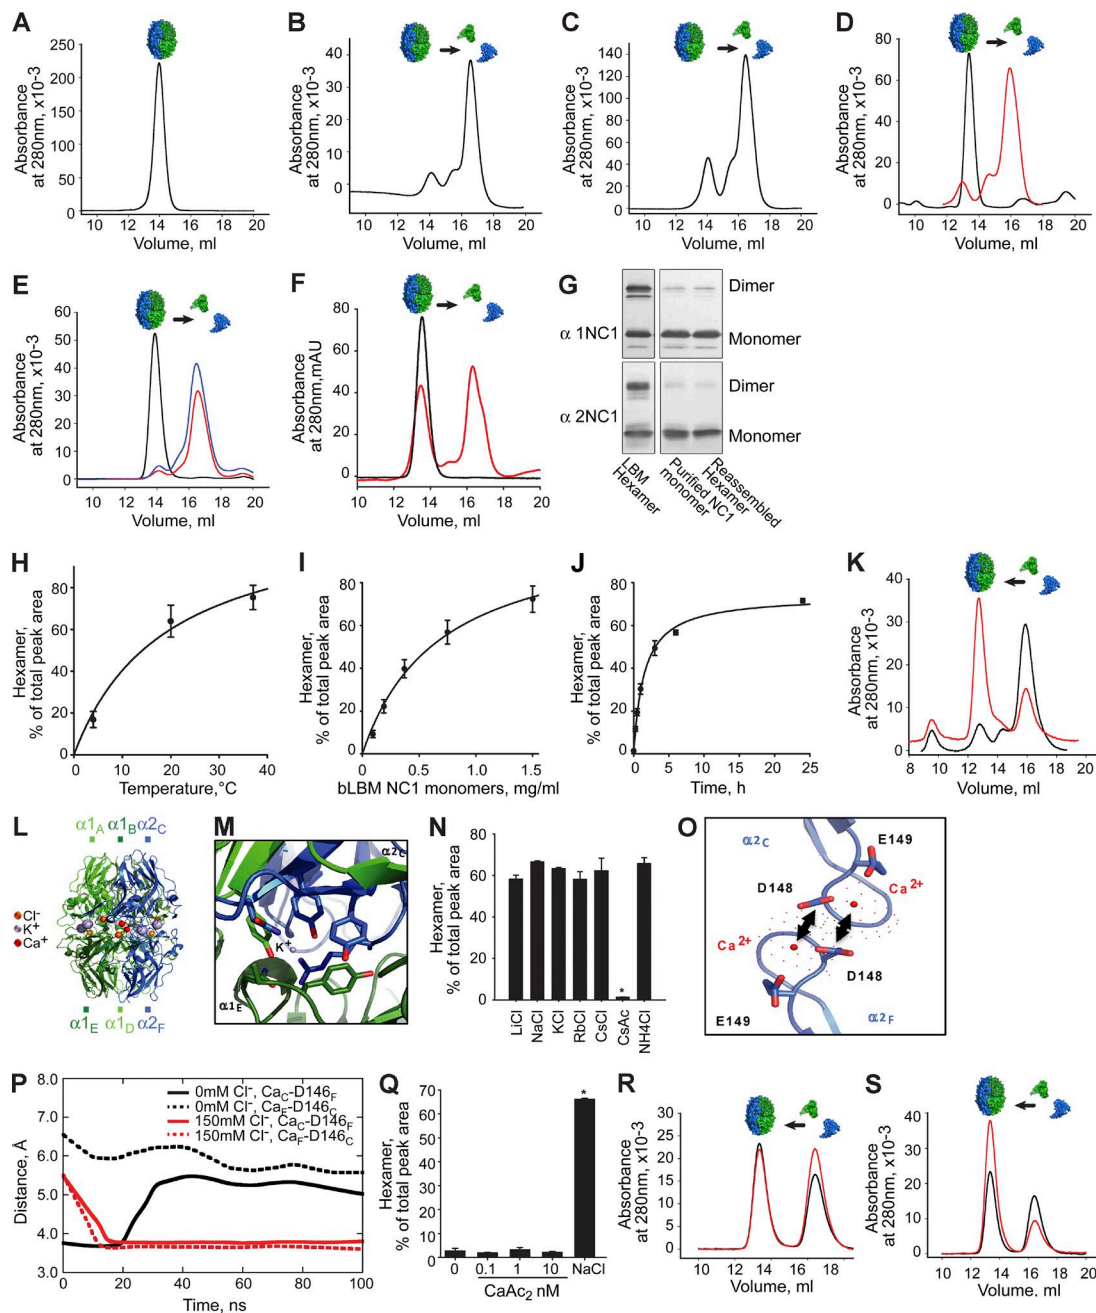

Figure S1. **Chloride is required for hexamer assembly.** (A–C) SEC profiles of native LBM NC1 hexamer in TBS (A) and LBM hexamer after dissociation in 6 M guanidine-HCl (B) or 8 M urea (C), causing loss of 14 ml hexamer peak and formation of 16.3 ml monomer peak. (D) Uncross-linked PFHR9 NC1 hexamers dissociate in TrisAc (red line) but not in TBS (black line). (E) Uncross-linked PFHR9 NC1 hexamers are stable in PBS (black line) but dissociate in 10 mM phosphate buffer, pH 7.4, irrespective of whether KI (red line) or phloroglucinol (blue line) was used to inhibit cross-linking in culture. (F) LBM hexamers dissociate in 10 mM phosphate buffer (red line; black line, undissociated control LBM hexamers in TBS, pH 7.4). (G) Composition of reassembled hexamers from LBM NC1 monomers in Cl<sup>-</sup>. Western blots developed using monoclonal antibodies to α1NC1 and α2NC1 domains. Vertical line denotes image boundary between distant lanes. Positions of NC1 monomers and cross-linked dimers are shown. (H–J) Characterizing hexamer reassembly with respect to incubation temperature (H), starting concentration of NC1 monomers (I), and incubation time (J). (K) Reassembly of PFHR9 NC1 hexamers triggered by Cl<sup>-</sup> (red line) from NC1 monomers (black line). (L) Molecular model of NC1 hexamer with individual NC1 domains labeled. (M) Molecular modeling of K<sup>+</sup> ions within hexamer structure. (N) Effect of monovalent cations on LBM hexamer reassembly (100 mM, Cl<sup>-</sup> salts). CsAc did not support reassembly in contrast with CsCl, demonstrating importance of Cl<sup>-</sup>. (O) Molecular model of Ca<sup>2+</sup> in hexamer (α2 NC1) interacting with E149 and D148. (P) MD simulations of distances between Ca<sup>2+</sup> ions and the carboxyl carbon of aspartic acid residues. (Q) CaAc<sub>2</sub> alone does not induce hexamer assembly from 0.1 to 10 mM. (R) Cl<sup>-</sup>-dependent assembly occurs equally well in TBS alone (black line) or with 0.2 mM EDTA (red line). (S) Ca<sup>2+</sup> may potentiate Cl<sup>-</sup> activity because the addition of 1 mM CaCl<sub>2</sub> in 100 mM NaCl (red line) appeared to enhance hexamer formation over 100 mM NaCl alone (black line). \*, P < 0.01.

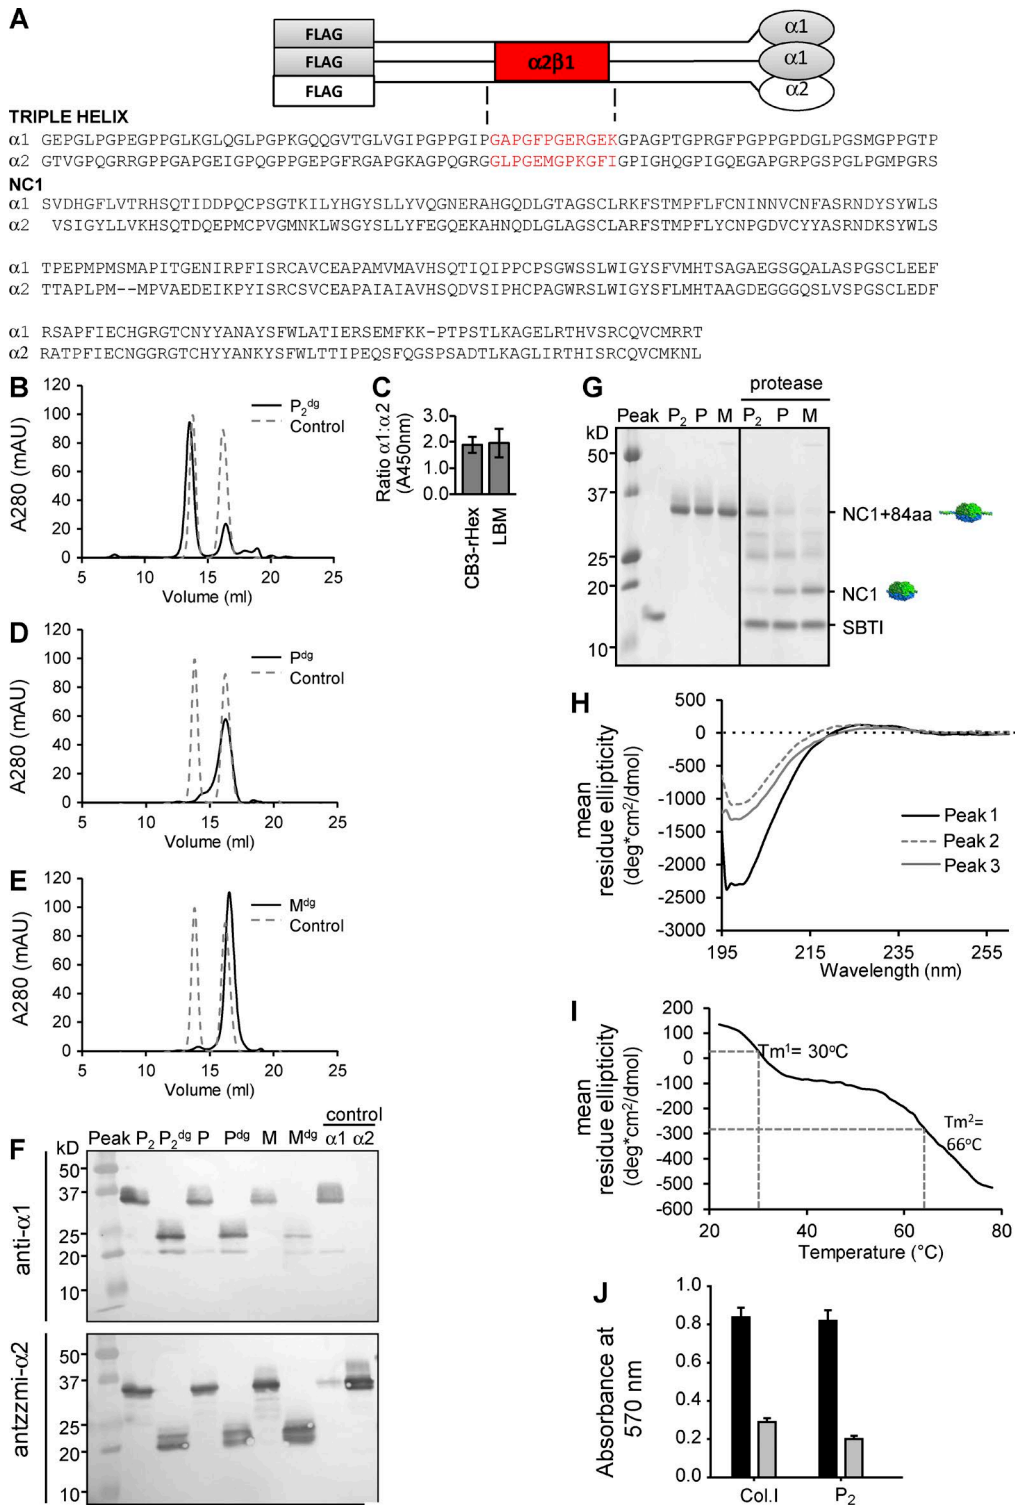

Figure S2. **Design and characterization of recombinant protomer (r-Prot).** (A) Schematic of heterotrimeric r-Prot containing integrin  $\alpha 2\beta 1$  binding site and N-terminal FLAG tag for purification. Primary aa sequence shown with red text identifying the engineered  $\alpha 2\beta 1$  integrin binding site. (B) SEC profile of  $P_2$  samples after collagenase treatment ( $P_2^{dg}$ ). Control sample (dashed line) contained mixture of NC1 hexamers isolated from LBM and recombinant  $\alpha 2$  NC1 monomers. (C) ELISA analyses of  $P_2$  (CB3-rHex) using anti- $\alpha 1$  and - $\alpha 2$  monoclonal antibodies. LBM NC1 hexamers were control. (D and E) SEC profiles of P ( $P^{dg}$ ) and M ( $M^{dg}$ ), respectively, after collagenase treatment. Control (dashed line) is the same as B. (F) Western blot of SEC peaks and collagenase digest products, using anti- $\alpha 1$  and - $\alpha 2$  monoclonal antibodies. Unfractionated samples (SEC input) served as controls. (G) All three SEC peaks migrate as 35 kD monomers by SDS-PAGE.  $P_2$  resisted trypsin and chymotrypsin proteolysis (NC1+84aa). Soybean trypsin inhibitor (SBTI) quenched reaction. (H and I) CD spectroscopy of SEC peaks ( $P_2$ , peak 1; P, peak 2; and M, peak 3). Helical content seen by negative ellipticity at 198 nm and positive ellipticity at 220–235 nm. (I) r-Prot thermal stability measured by CD. 30°C and 66°C transition point correspond to melting temperatures of helices and NC1 domains, respectively. (J) HT1080 cells adhesion to recombinant protomer dimer ( $P_2$ ) is mediated by the integrin  $\alpha 2\beta 1$ . Cell adhesion to wells coated with  $P_2$  (black bar) was significantly inhibited by neutralizing monoclonal antibody to  $\alpha 2\beta 1$  integrin (gray bar). Collagen I, a known ligand for  $\alpha 2\beta 1$  integrin, has been used as a positive control.

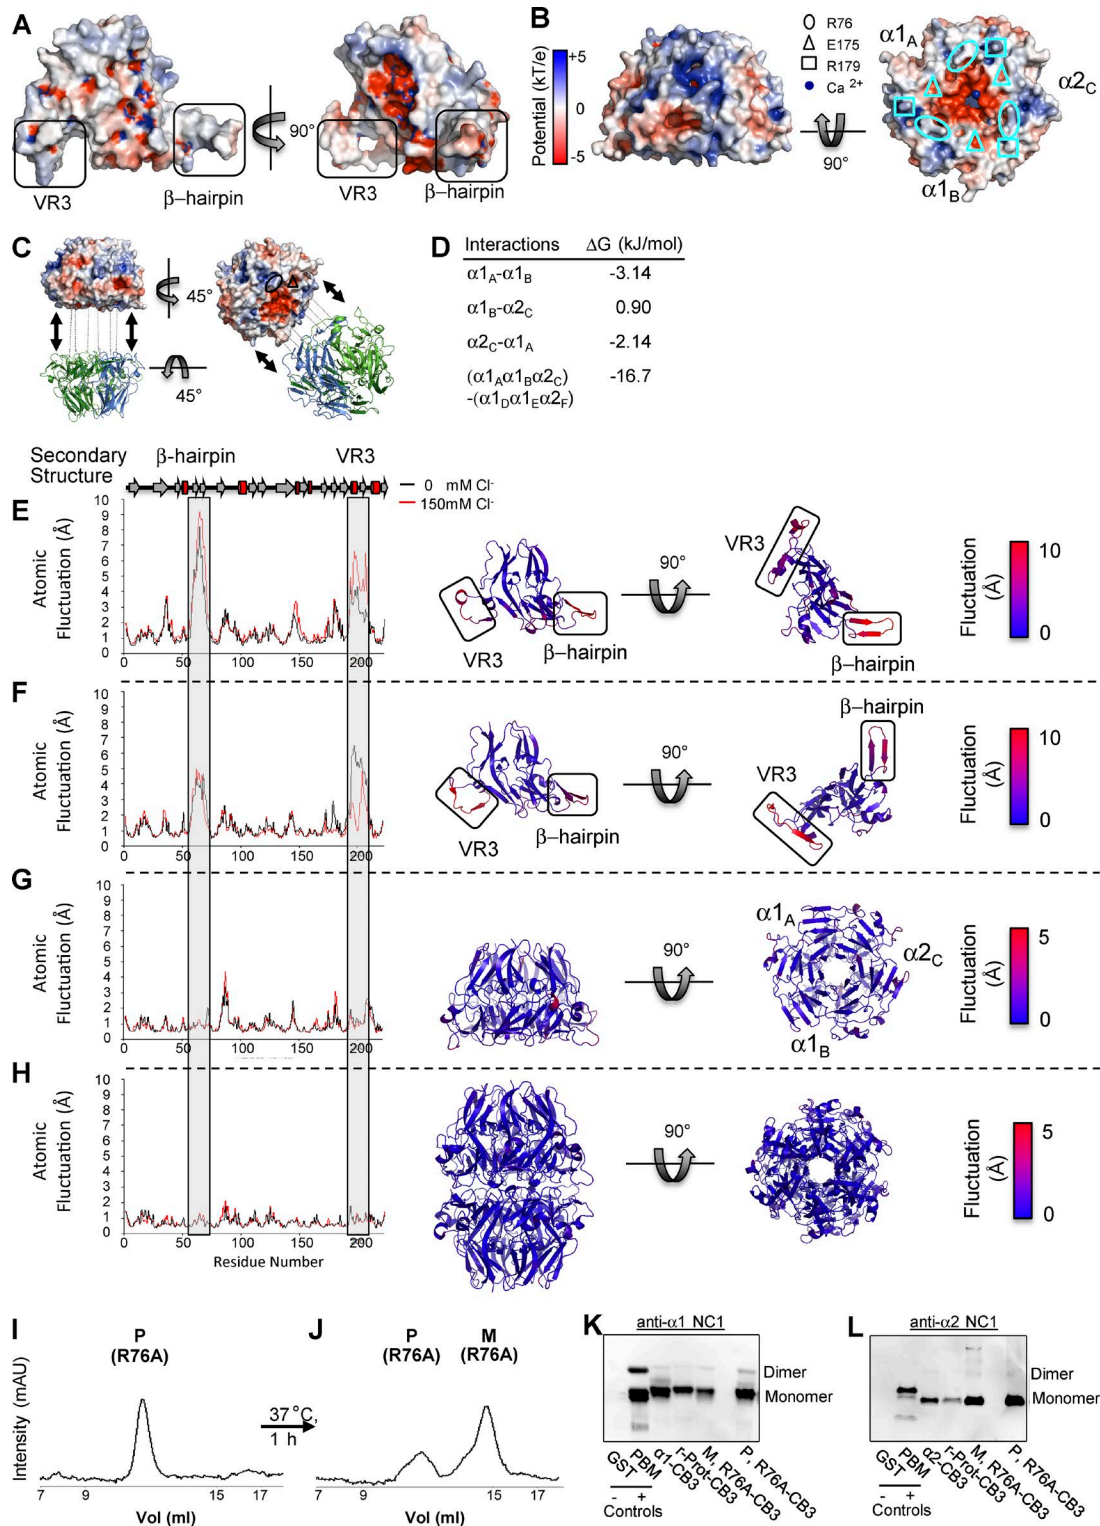

**Figure S3. Thermodynamic and mutational analysis of hexamer assembly.** (A) Protomer specificity is dictated by VR3 and  $\beta$ -hairpin interactions. Electrostatic surface potentials on the NC1 monomer van der Waals surface show the VR3 and  $\beta$ -hairpin regions are mostly charge neutral. (B) The trimer electrostatic surface potential shows that the interface is dominated by electro-negative potential in the center cavity that surrounds the calcium binding site, whereas R76, G175, and R179 comprise discrete charge pockets (units = Boltzman's constant [k]  $\times$  temperature [298 K]/electron charge [q]). (C) Charged pockets are complementary in trimer-trimer association. (D) From nonlinear Poisson-Boltzmann calculations, salt has a favorable impact on  $\alpha 1_A$ - $\alpha 1_B$ ,  $\alpha 1_B$ - $\alpha 2_C$ , and trimer-trimer association and a negative effect on  $\alpha 1_B$ - $\alpha 2_C$  association. (E-H) Atomic fluctuations of the  $\alpha 1$  monomer (E),  $\alpha 2$  monomer (F),  $\alpha 112$  trimer (G), and  $\alpha 112$  hexamer (H) measured in 0 (black) and 150 mM Cl<sup>-</sup> (red).  $\beta$ -Hairpin and VR3 regions denoted by gray filled boxes. For  $\alpha 112$  trimer and hexamer system, the  $\alpha 1$  A chain is depicted. Atomic fluctuations are projected onto representative structures (right). (I) R76A chimeras of both  $\alpha 1$ -CB3 and  $\alpha 2$ -CB3 constructs were expressed and combined to form P. (J) Above helical melting temperature, P samples with R76A mutations dissociated to monomeric chains by SEC. (K and L) Western blot analysis of R76A products, showing reactivity to  $\alpha 1$  (K) and  $\alpha 2$  (L) NC1 antibodies.

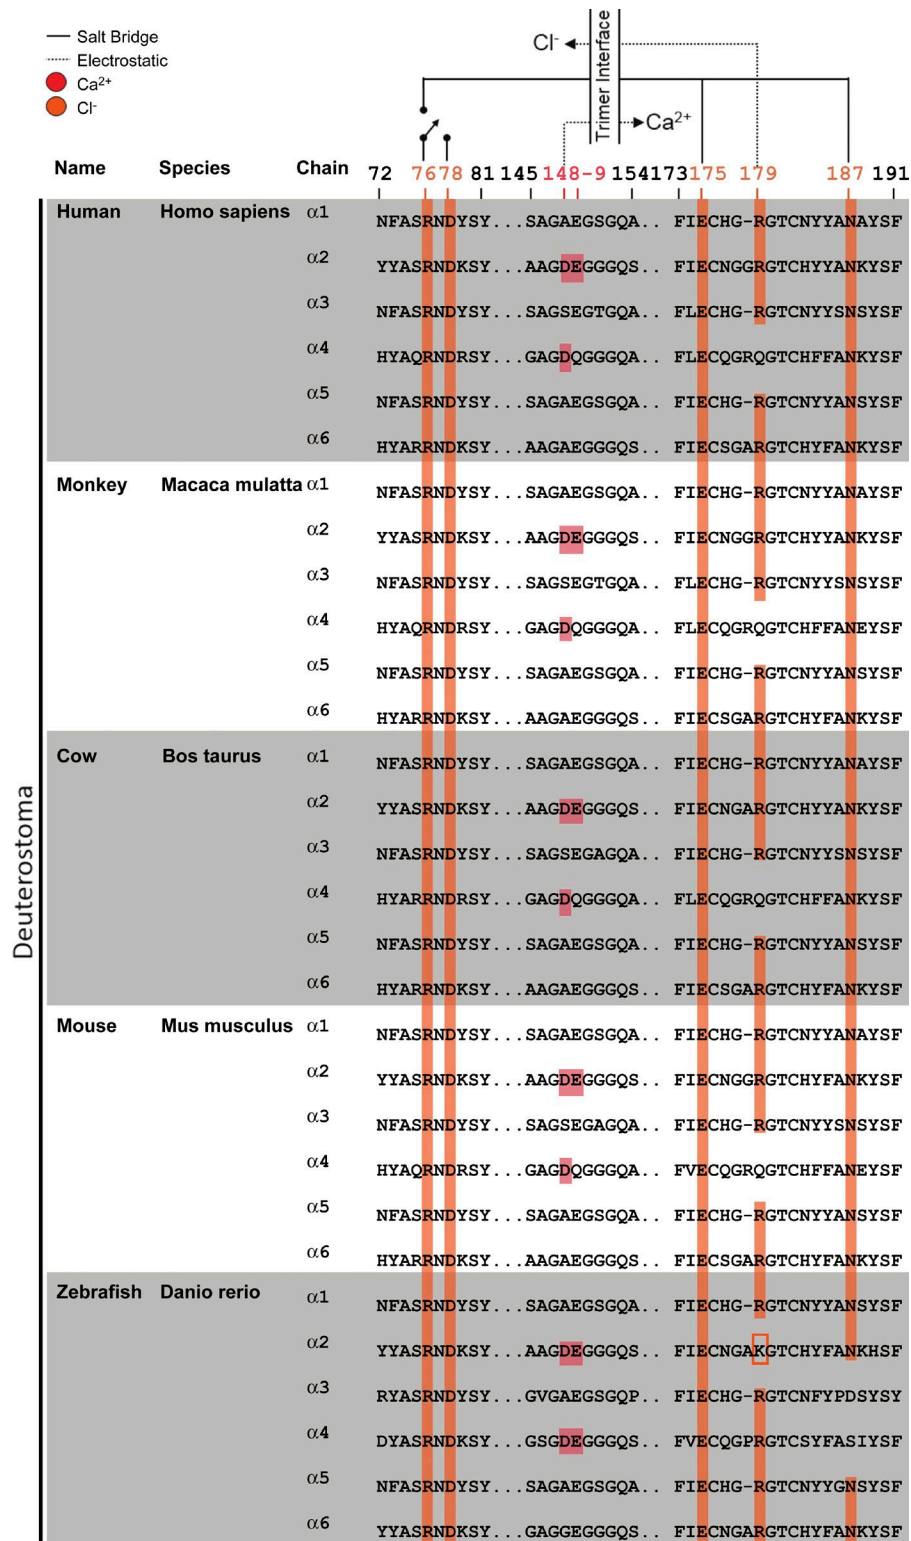

Figure S4. **Assembly Switch Motif is Present in  $\alpha$ 1- $\alpha$ 6 Chains.** Multiple sequence alignment of  $\alpha$ 1-6 chains from human, monkey, cow, mouse, and zebrafish, with emphasis on putatively important assembly residues near the trimer-trimer interface.

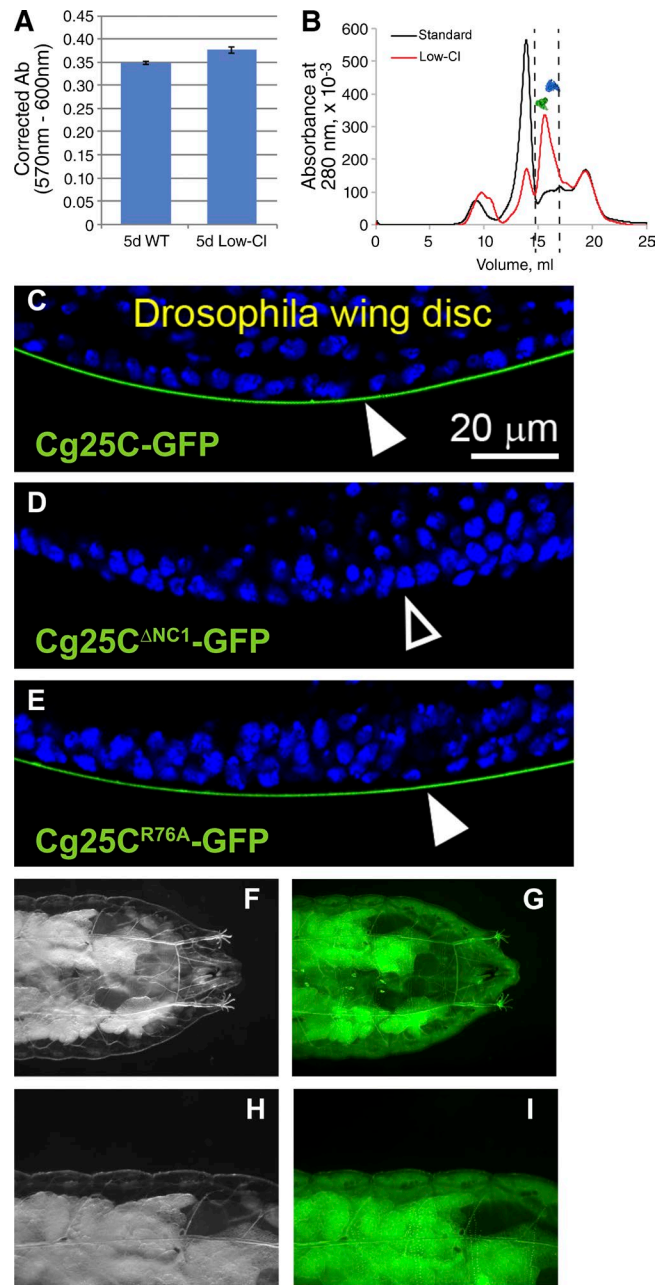

Figure S5. **NC1 domains are required for collagen IV network assembly.** (A) Cellular viability is not reduced in low-Cl conditions compared with standard conditions. Results shown from PrestoBlue assay.  $n = 12$ . (B) NC1 monomers from standard and low-Cl cultures were isolated via SEC. Samples analyzed after collagenase digestion and dialysis into 50 mM TrisAc. Dashed lines denote monomer fractions collected. (C–E) Confocal images of *Drosophila* wing imaginal disks dissected from larvae expressing C-terminally GFP-tagged Cg25C (C), Cg25C<sup>ΔNC1</sup> (D), and Cg25C<sup>R76A</sup> (E). Expression of the three constructs is driven in the fat body under control of Cg-GAL4. WT collagen IV (Cg25C-GFP) localizes to the BM (C), whereas Cg25C<sup>ΔNC1</sup>-GFP does not incorporate into the BM in the presence of endogenous collagen IV (D). (F–I) Cg25C<sup>ΔNC1</sup>-GFP expression products were detected in the larval body cavity, indicating that NC1 domains are required for assembling collagen IV into networks within BMs. H and I are enlarged images of F and G, respectively.

Table S1. Comparison of interactions stabilizing monomer–monomer and trimer–trimer associations

| Interaction                       | Subunits                    | Salt bridges | Electrostatic | H-bonds | Total polar | Nonpolar | Total | Ratio (NP/P) |
|-----------------------------------|-----------------------------|--------------|---------------|---------|-------------|----------|-------|--------------|
| Trimer–trimer (end-to-end)        | $\alpha 1_A$ – $\alpha 1_D$ | 2            | 2             | 12      | 16          | 34       | 50    | 2.1          |
|                                   | $\alpha 1_A$ – $\alpha 1_E$ | 0            | 0             | 2       | 2           | 23       | 25    | 11.5         |
|                                   | $\alpha 1_A$ – $\alpha 2_F$ | 0            | 0             | 0       | 0           | 0        | 0     | 0            |
|                                   | $\alpha 1_B$ – $\alpha 1_D$ | 0            | 0             | 3       | 3           | 21       | 24    | 7            |
|                                   | $\alpha 1_B$ – $\alpha 1_E$ | 0            | 0             | 2       | 2           | 2        | 4     | 1            |
|                                   | $\alpha 1_B$ – $\alpha 2_F$ | 2            | 2             | 9       | 13          | 39       | 52    | 3            |
|                                   | $\alpha 2_C$ – $\alpha 1_D$ | 0            | 0             | 0       | 0           | 0        | 0     | 0            |
|                                   | $\alpha 2_C$ – $\alpha 1_E$ | 2            | 2             | 12      | 16          | 44       | 60    | 2.8          |
|                                   | $\alpha 2_C$ – $\alpha 2_F$ | 0            | 0             | 1       | 1           | 19       | 20    | 19           |
|                                   | Subtotal                    | 6            | 6             | 41      | 53          | 182      | 235   | 3.4          |
| Density                           | 0.45                        | 0.45         | 3.1           | 4       | 13.8        |          | 3.5   |              |
| Monomer–monomer<br>(side-to-side) | $\alpha 1_A$ – $\alpha 1_B$ | 1            | 0             | 15      | 16          | 81       | 97    | 5.1          |
|                                   | $\alpha 1_B$ – $\alpha 2_C$ | 2            | 0             | 20      | 22          | 88       | 110   | 4            |
|                                   | $\alpha 2_C$ – $\alpha 1_A$ | 1            | 0             | 17      | 18          | 83       | 101   | 4.6          |
|                                   | Subtotal                    | 4            | 0             | 49      | 53          | 252      | 305   | 4.8          |
|                                   | Density                     | 0.19         | 0             | 3.1     | 3.3         | 16.2     |       | 4.9          |

Enumeration of the modeled noncovalent interactions present between NC1 domains as well as between NC1 trimers, using the LIGPLOT+ algorithm (Wallace et al., 1995). NP, nonpolar; P, polar.

Table S2. Low-Cl media composition

| Component                  | Catalog number | Final concentration | Molecular mass | mg/liter |
|----------------------------|----------------|---------------------|----------------|----------|
|                            |                | mM                  | g/mol          |          |
| Neutral aa                 |                |                     |                |          |
| Glycine                    | G7126          | 0.4                 | 75.07          | 30.0     |
| L-Arginine                 | A8094          | 0.4                 | 174.2          | 69.7     |
| L-Cystine                  | C7602          | 0.2                 | 240.3          | 48.1     |
| L-Glutamine                | 49419          | 4                   | 146.14         | 584.6    |
| L-Histidine                | 53319          | 0.2                 | 155.15         | 31.0     |
| L-Isoleucine               | W527602        | 0.8                 | 131.17         | 104.9    |
| L-Leucine                  | 61819          | 0.8                 | 131.17         | 104.9    |
| L-Lysine                   | L9037          | 0.8                 | 164.2          | 131.4    |
| L-Methionine               | 64319          | 0.2                 | 149.21         | 29.8     |
| L-Phenylalanine            | P5482          | 0.4                 | 165.19         | 66.1     |
| L-Serine                   | S4311          | 0.4                 | 105.09         | 42.0     |
| L-Threonine                | 89179          | 0.8                 | 119.12         | 95.3     |
| L-Tryptophan               | 93659          | 0.08                | 204.23         | 16.3     |
| L-Tyrosine                 | 93829          | 0.4                 | 181.19         | 72.5     |
| L-Valine                   | V0513          | 0.8                 | 117.15         | 93.7     |
| Vitamin                    |                |                     |                |          |
| Choline citrate            | C2004          | 0.03                | 295.29         | 8.9      |
| D-calcium pantothenate     | P5155          | 0.008               | 238.27         | 1.9      |
| Folic acid                 | F8758          | 0.009               | 441.4          | 4.0      |
| Niacinamide                | PHR1033        | 0.033               | 122.12         | 4.0      |
| Pyridoxine (neutral)       | P5669          | 0.02                | 169.18         | 3.4      |
| Riboflavin                 | R4500          | 0.001               | 376.36         | 0.4      |
| Thiamine ntrate            | CDS000474      | 0.012               | 327.36         | 3.9      |
| Myoinositol                | 57569          | 0.04                | 180.16         | 7.2      |
| Bulk salts/minerals        |                |                     |                |          |
| Sodium glutamate           | S2054          | 115                 | 218.14         | 25.08    |
| Sodium bicarbonate         | S5761          | 44                  | 84.007         | 3,696.3  |
| Calcium lactate            | L4388          | 1.8                 | 218.22         | 392.8    |
| Iron (III) Nitrate         | 254223         | 0.001               | 404            | 0.4      |
| Magnesium sulfate          | M9397          | 0.8                 | 246.47         | 197.2    |
| Sodium phosphate monobasic | 71492          | 0.4                 | 119.98         | 48.0     |
| Sodium phospahte dibasic   | 71629          | 0.3                 | 141.96         | 42.6     |
| D-Glucose                  | G7021          | 25                  | 180.16         | 4,504.0  |
| Sodium pyruvate            | P2256          | 1                   | 110.04         | 110.0    |
| Antibiotic                 |                |                     |                |          |
| Penicillin P3032           | P3032          | 100 U/ml            | 356.3          | 60.45    |
| Streptomycin S1277         | S1277          | 100 U/ml            | 728.69         | 100      |

## Reference

Wallace, A.C., R.A. Laskowski, and J.M. Thornton. 1995. LIGPLOT: a program to generate schematic diagrams of protein-ligand interactions. *Protein Eng.* 8:127–134. <http://dx.doi.org/10.1093/protein/8.2.127>
